# Supplementary material for: Adaptation under Integrating Seasonal and AQUACROP Simulations to Evaluate Soil Moisture and Drip Irrigation Effects on Tomato Production in Southern Ethiopia
Source: Research Square preprint supplement (doi:10.21203/rs.3.rs-7945516/v1), 2026-01-09
Supplement: Supplementary file 1 [file f24fef3570c4e7049860eea2.docx]

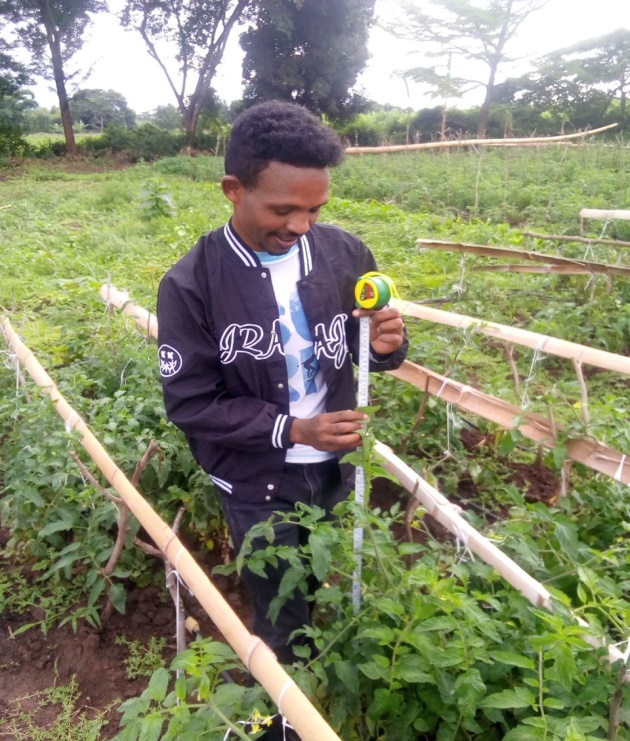

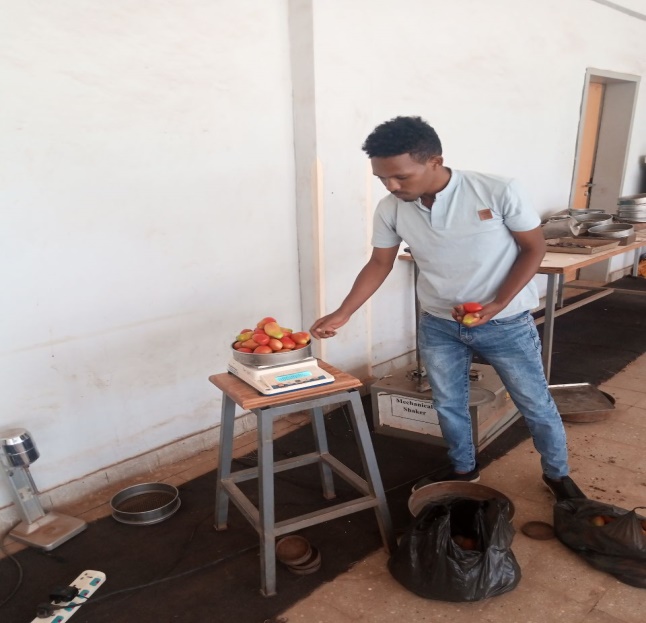


Appendix Figure 1: Measurements of Crop parameter


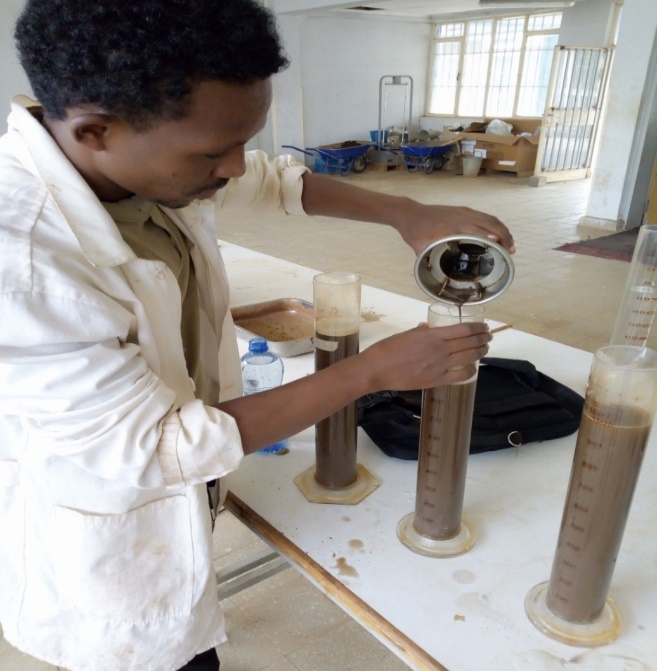

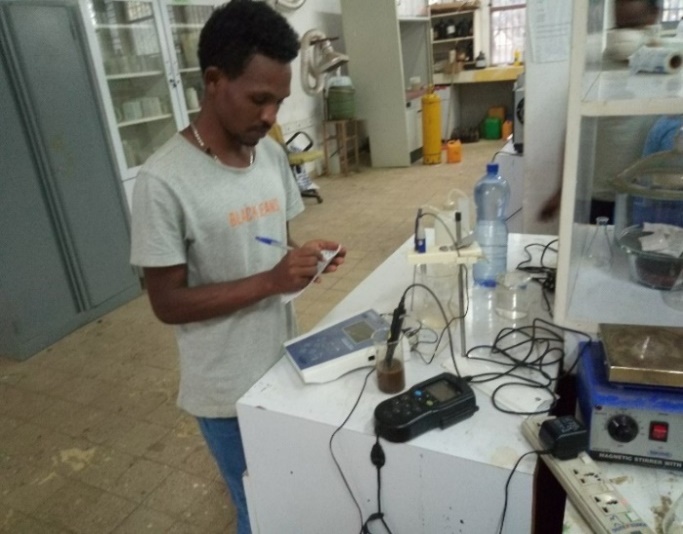


Appendix Figure 2: Determination of the soil and irrigation water quality


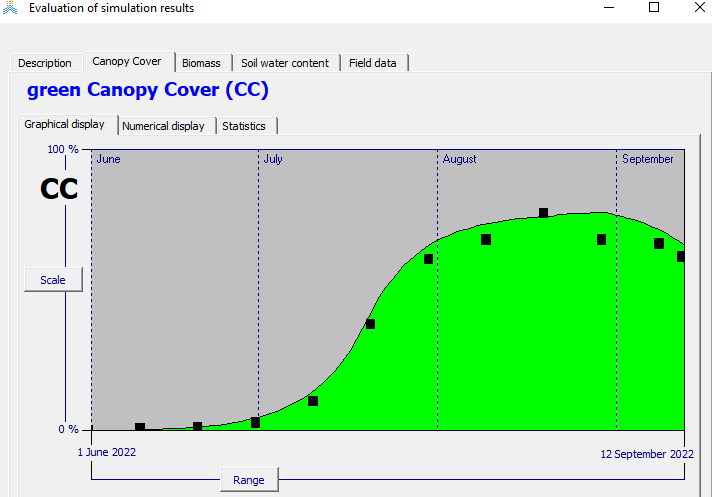

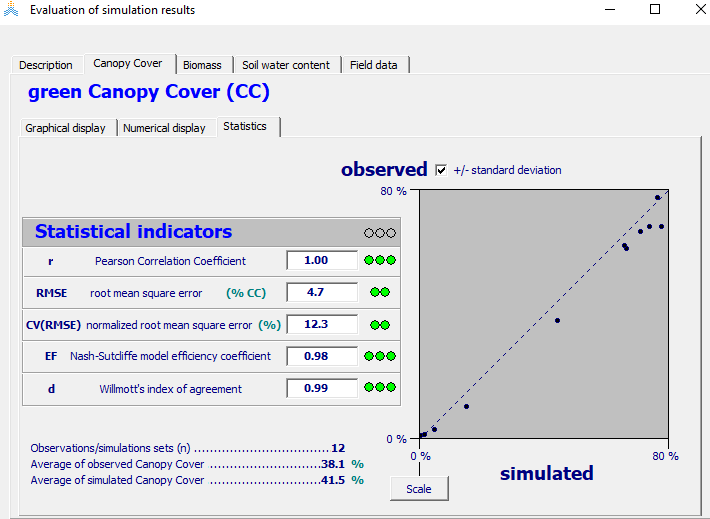


Figure 1: Validation performance of T1 on CC value


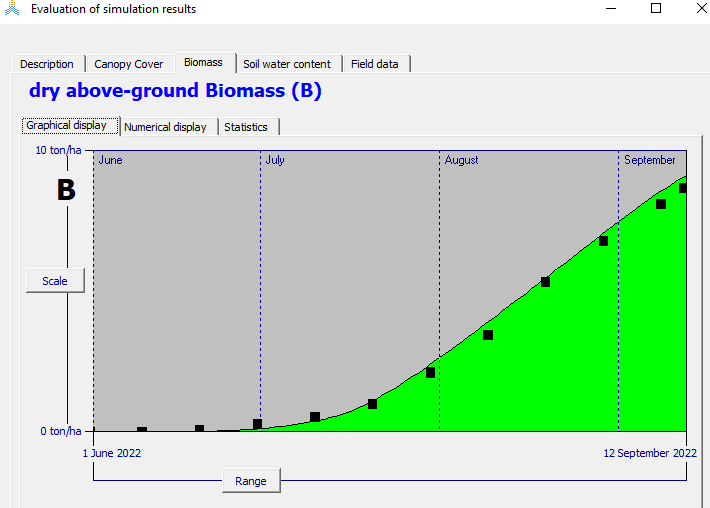

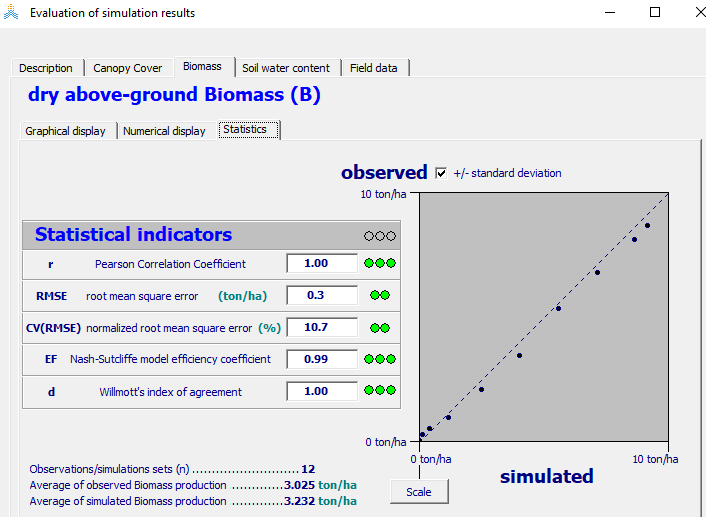


Figure 2: Figure 1: Validation performance of T1 on BM value


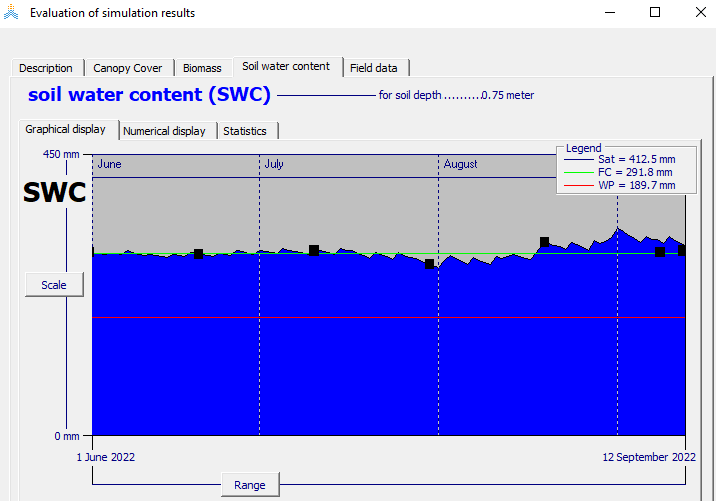

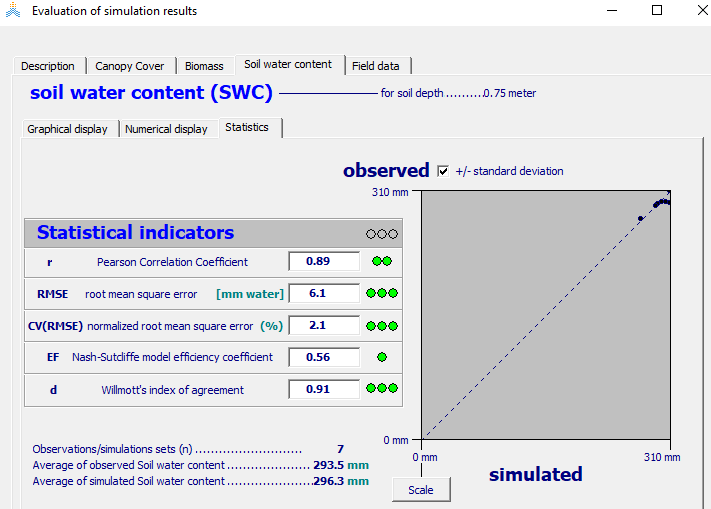


Figure 3: Validation performance of T1 on SWC value


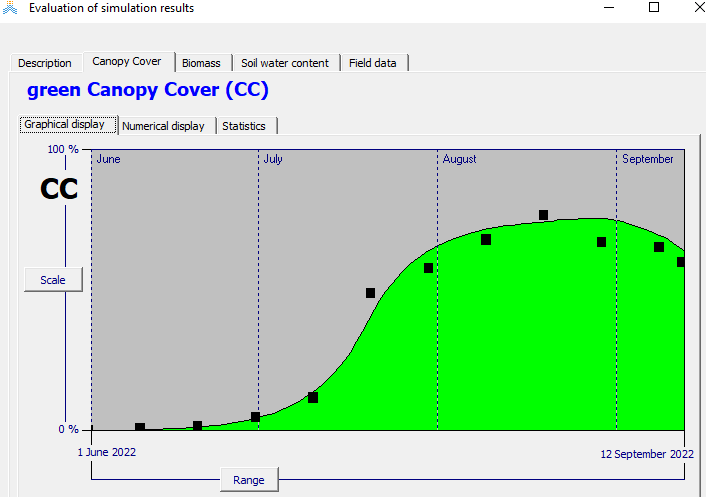

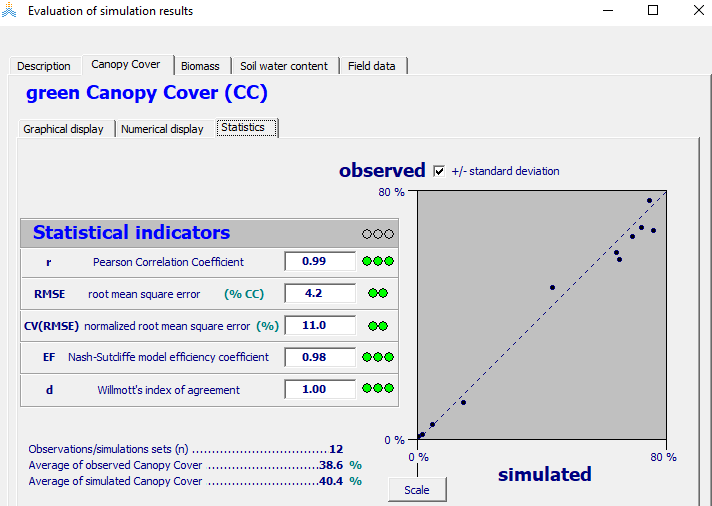


Figure 4: Validation performance of T2 on CC value


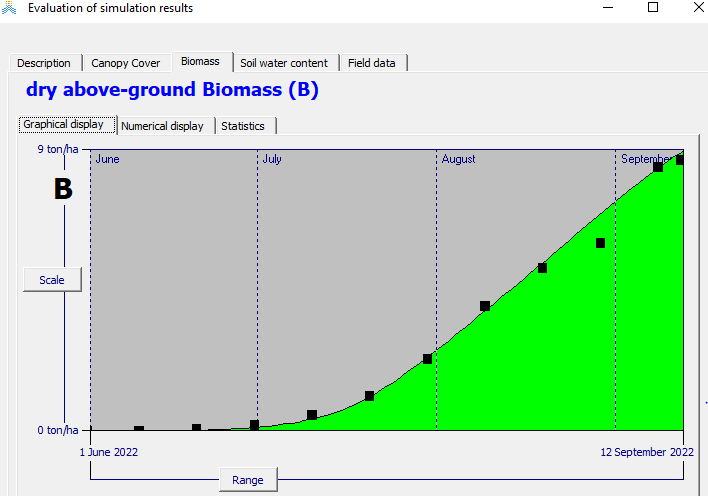

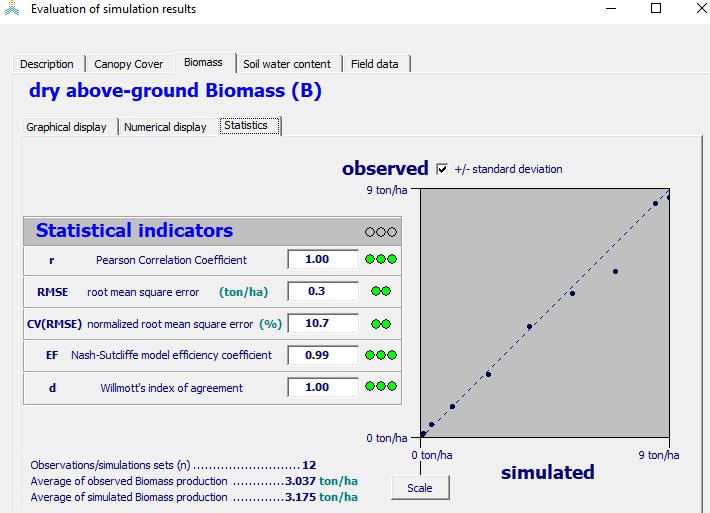


Figure 5: Validation performance of T2 on BM value


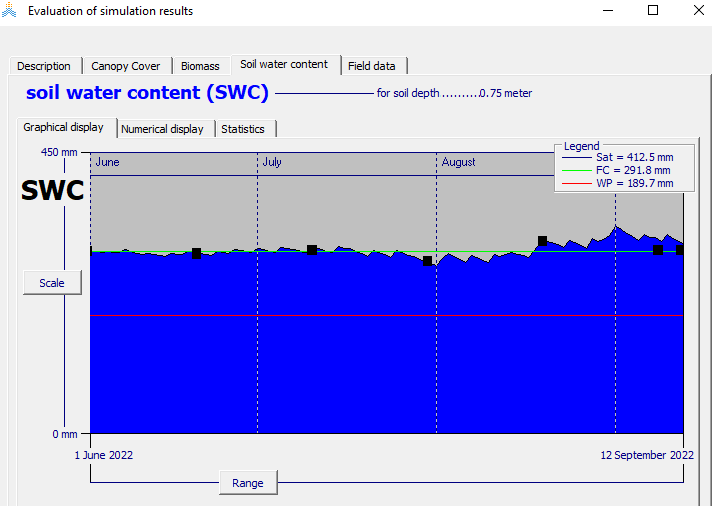

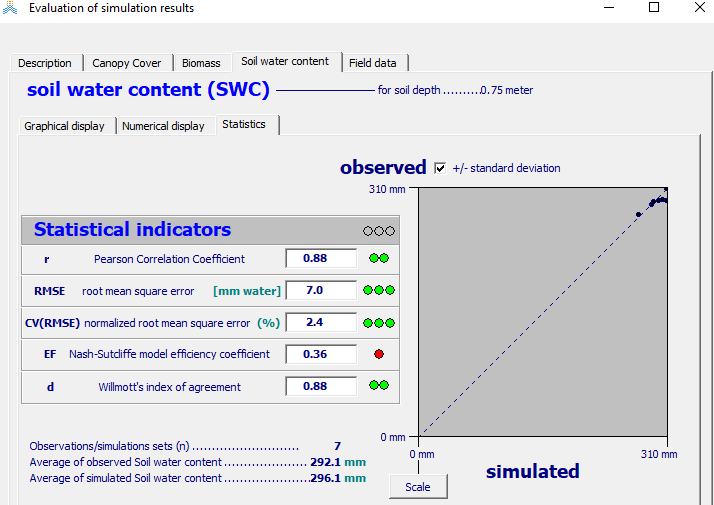


Figure 6: Validation performance of T2 on SWC value


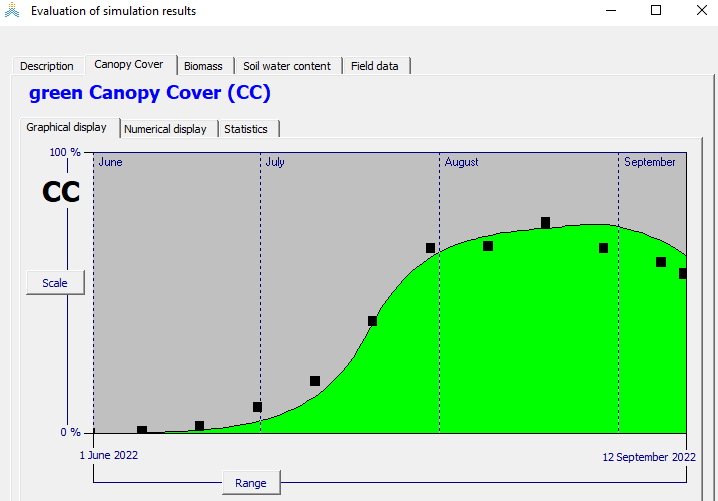

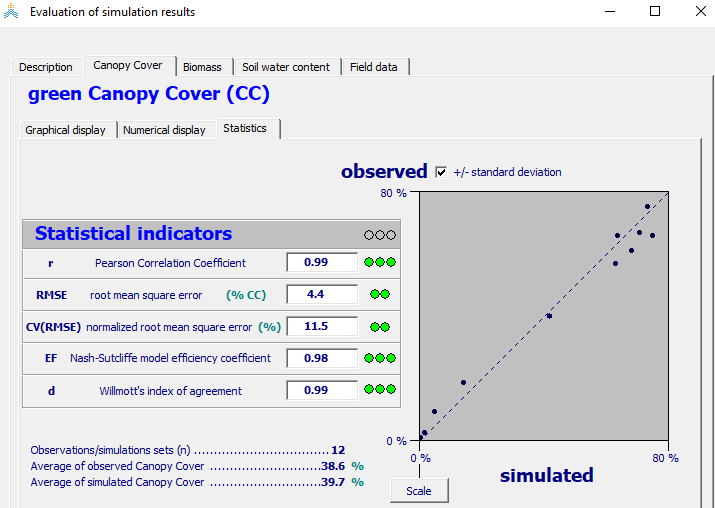


Figure 7: Validation performance of T3 on CC value


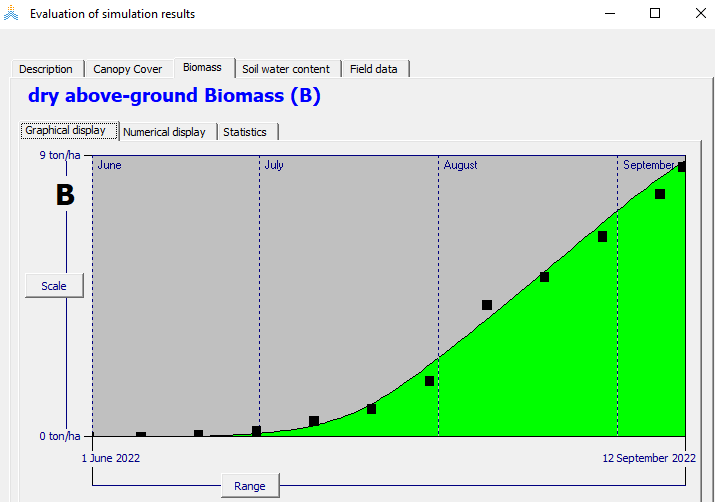

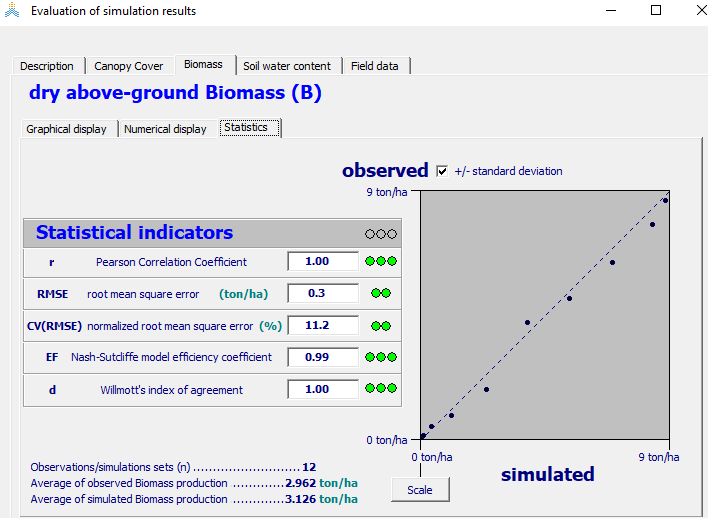


Figure 8: Validation performance of T3 on BM value


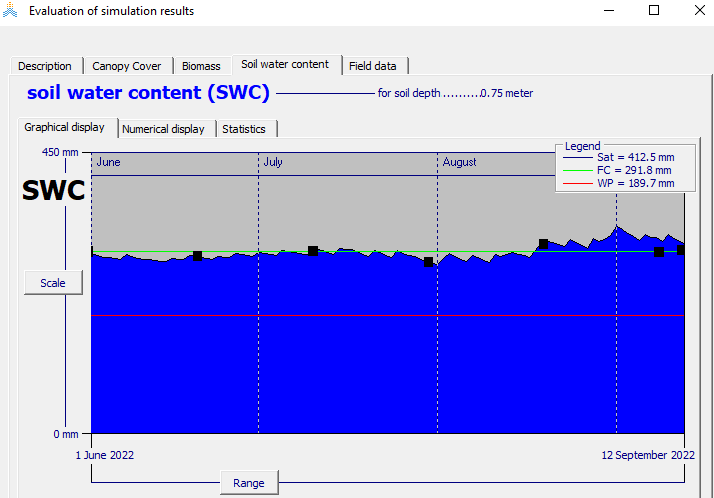

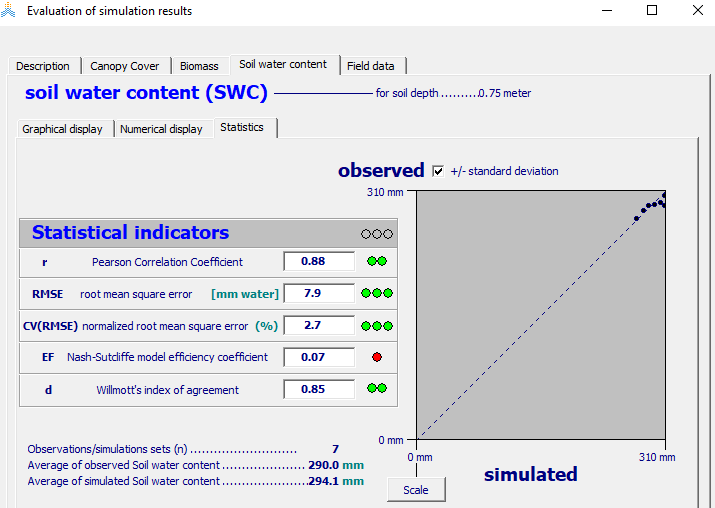


Figure 9: Validation performance of T3 on SWC value


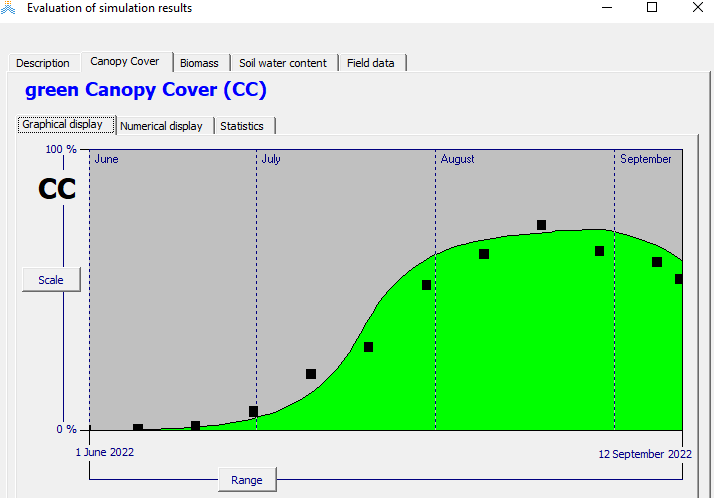

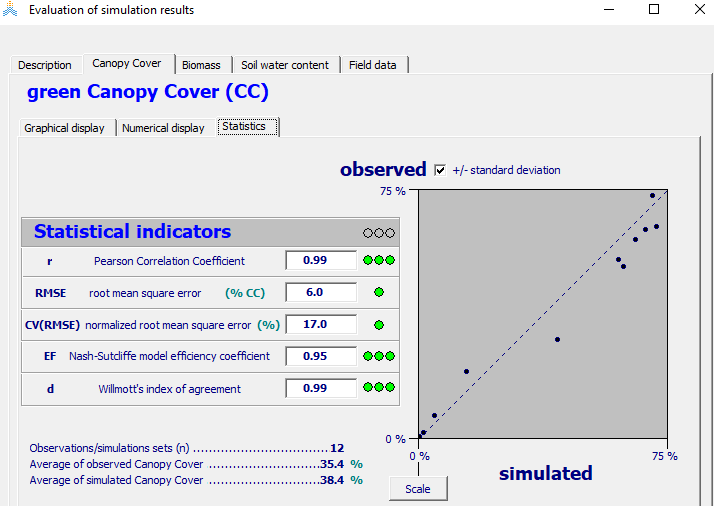


Figure 10: Validation performance of T4 on CC value


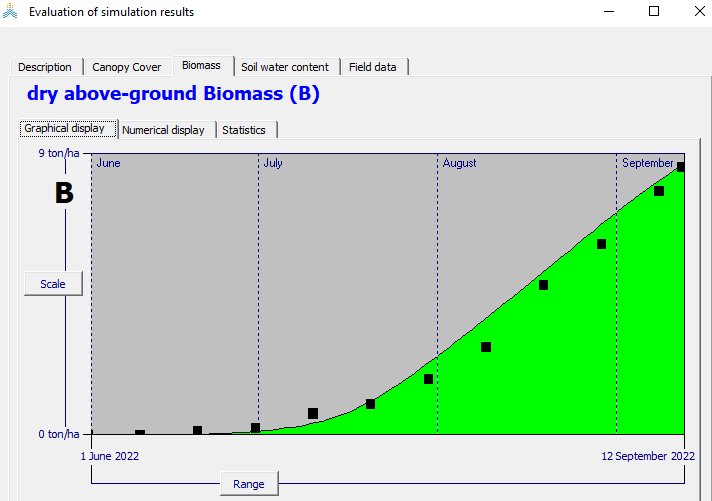

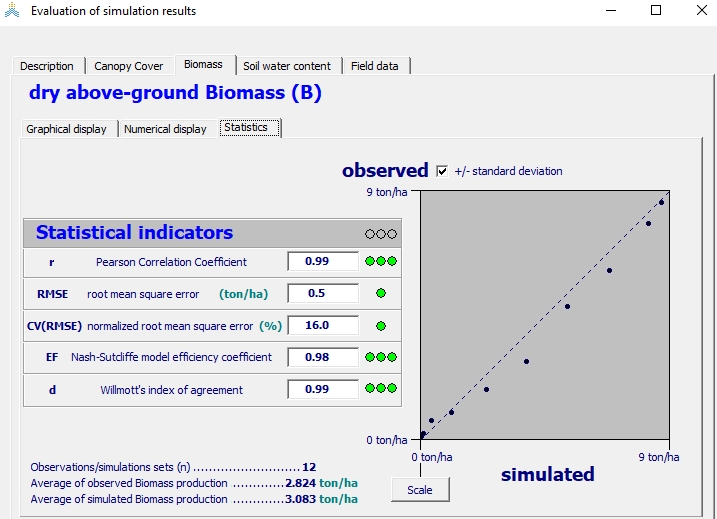


Figure 11: Validation performance of T4 on BM value


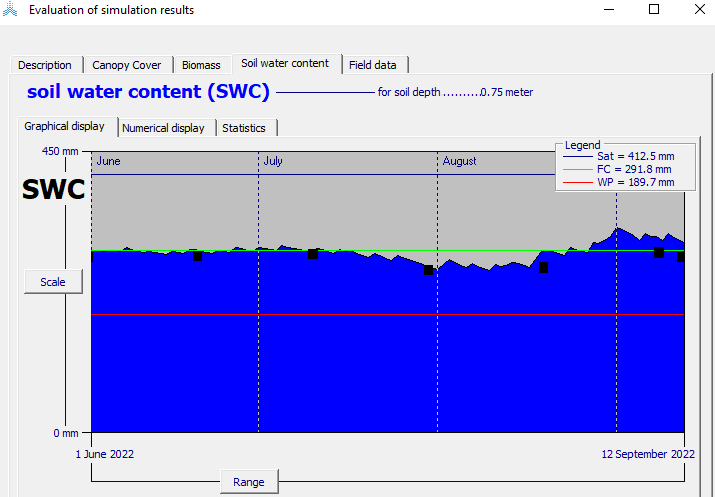

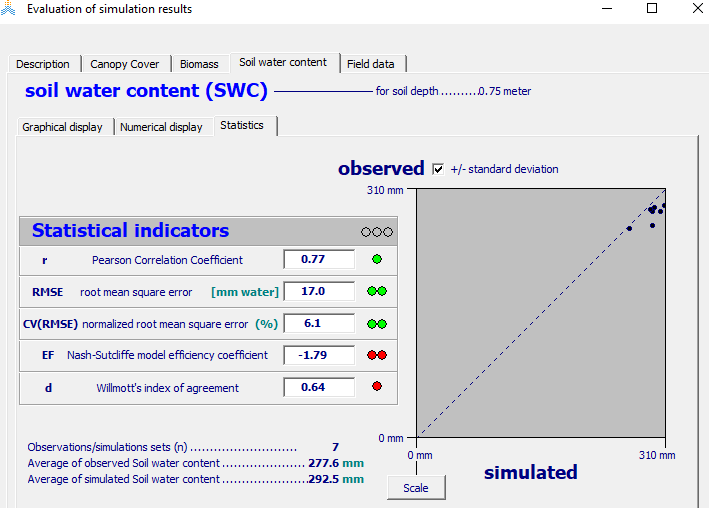


Figure 12: Validation performance of T4 on SWC value


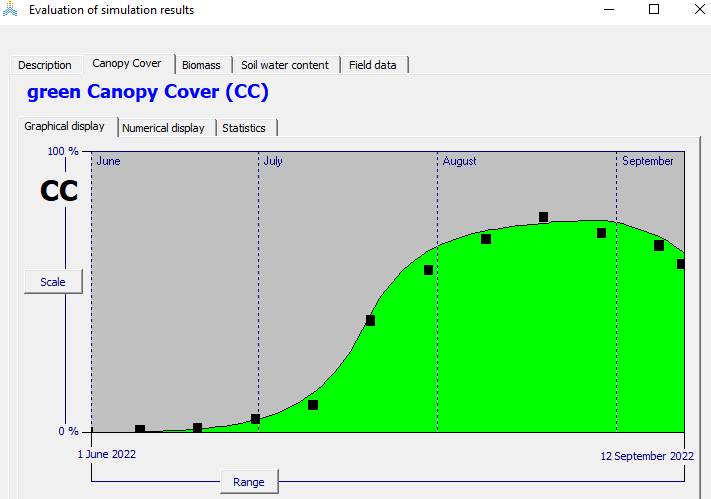

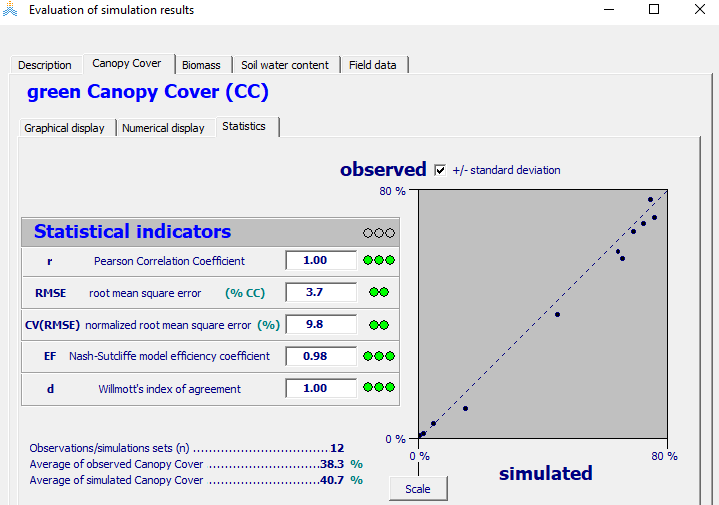


Figure 13: Validation performance of T5 on CC value


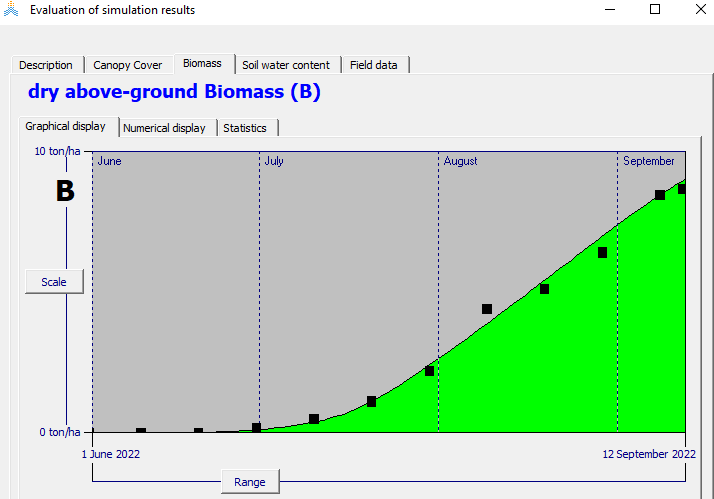

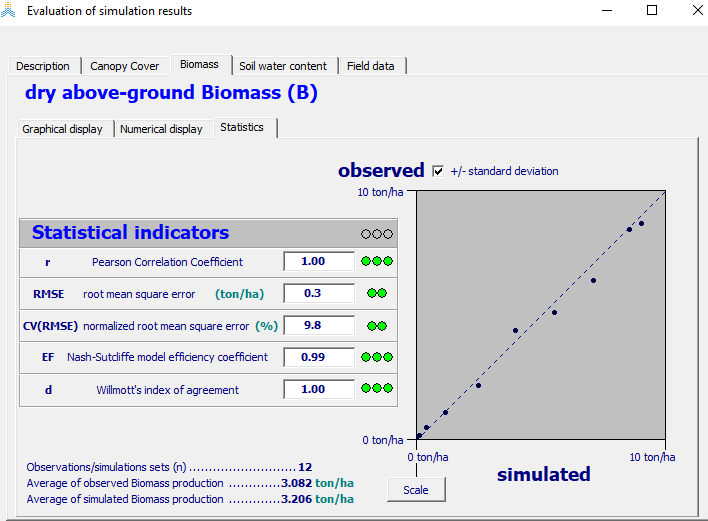


Figure 14: Validation performance of T5 on BM value


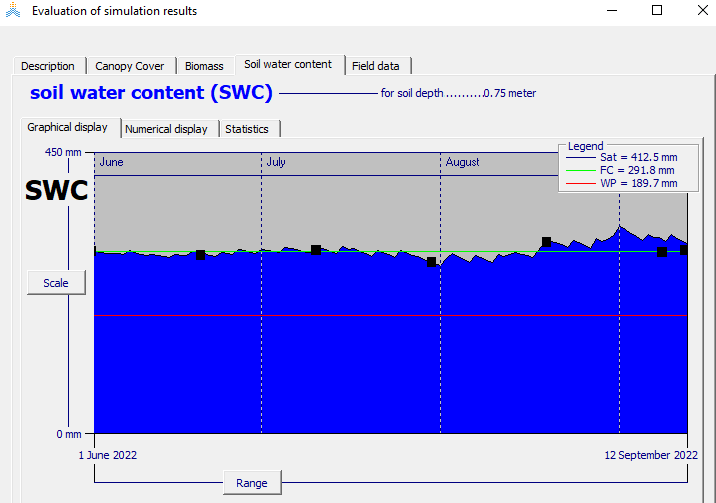

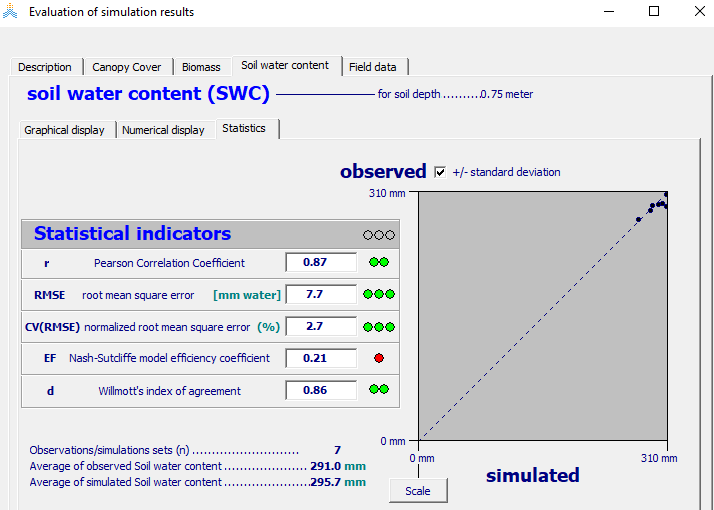


Figure 15: Validation performance of T5 on SWC value


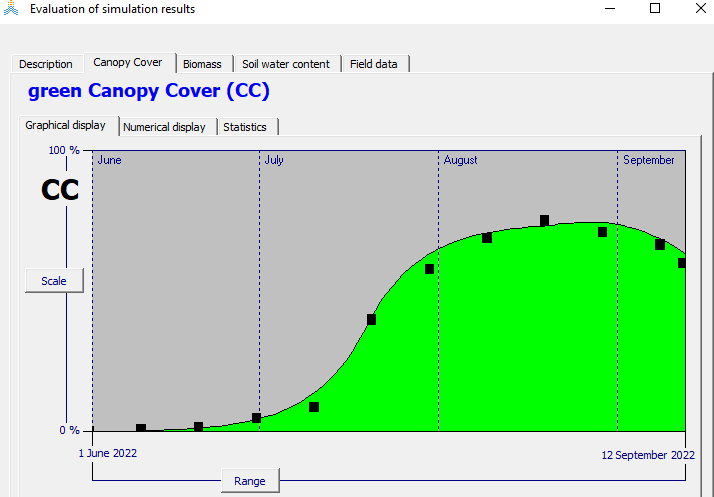

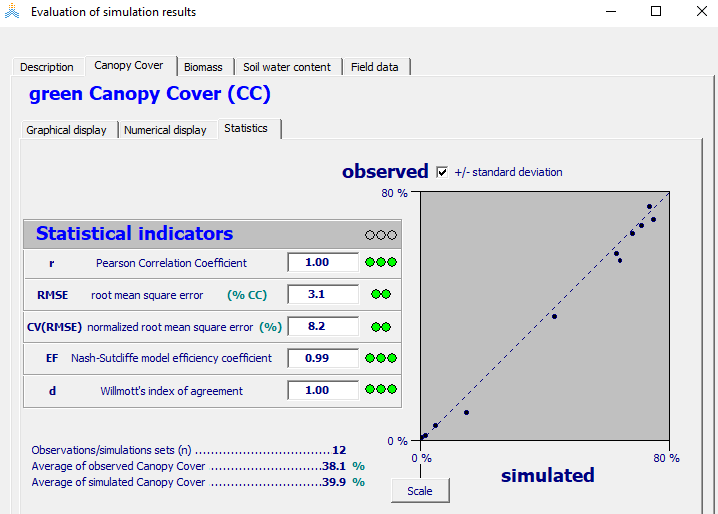


Figure 16: Validation performance of T6 on CC value


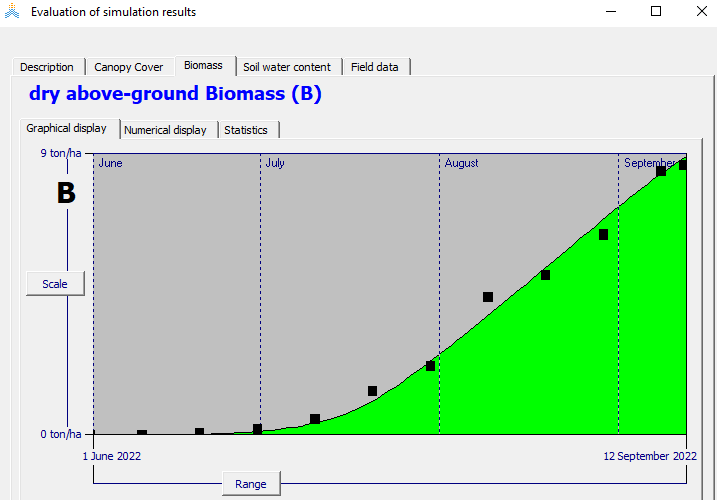

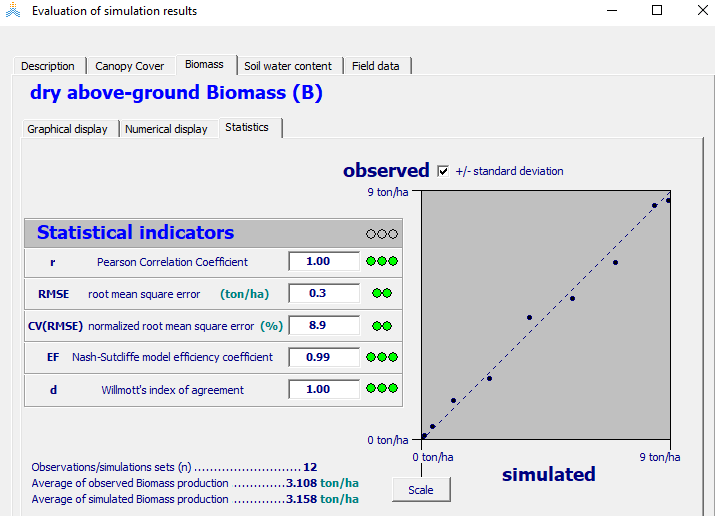


Figure 17: Validation performance of T6 on BM value


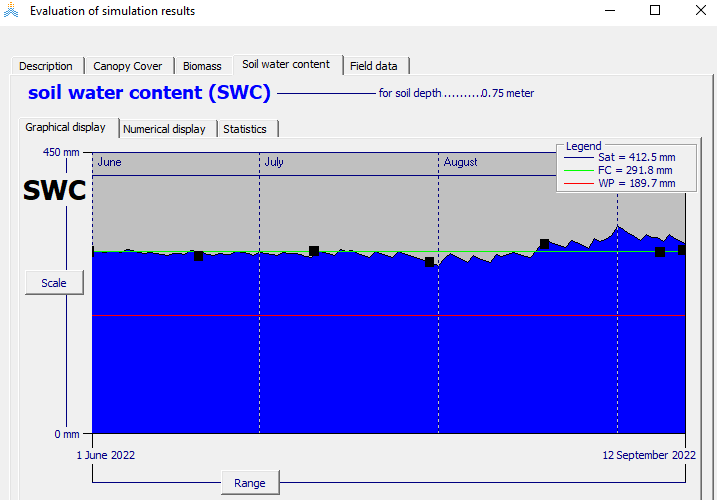

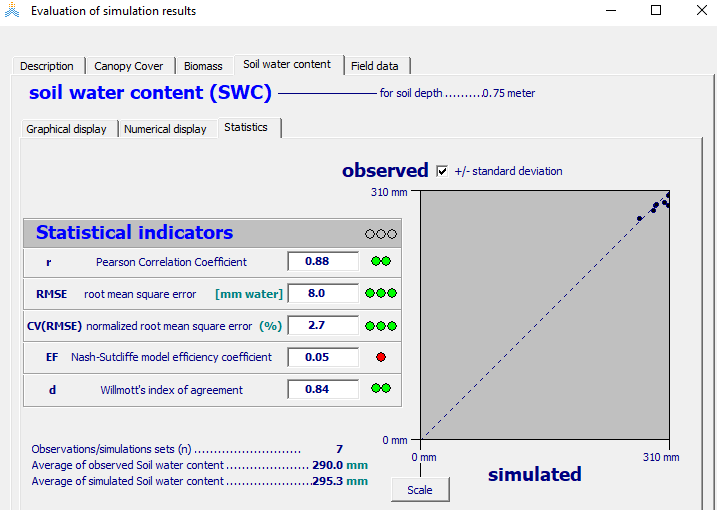


Figure 18: Validation performance of T6 on SWC value


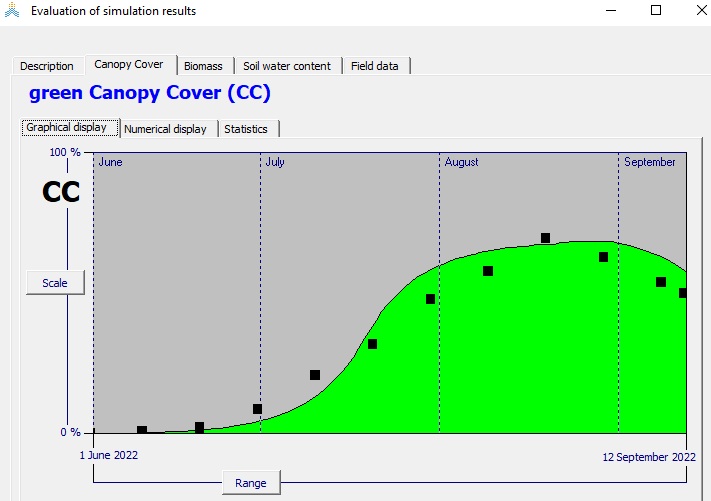

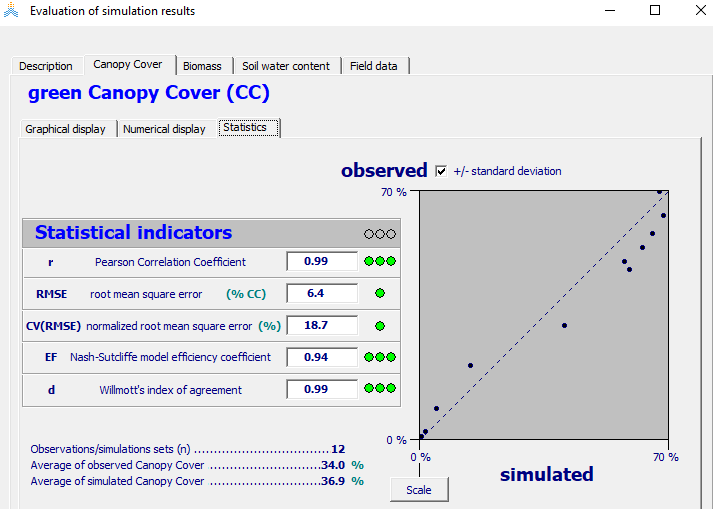


Figure 19: Validation performance of T7on CC value


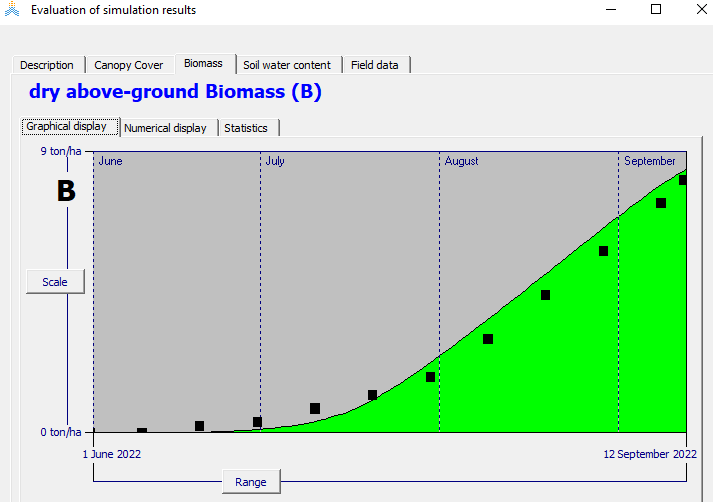

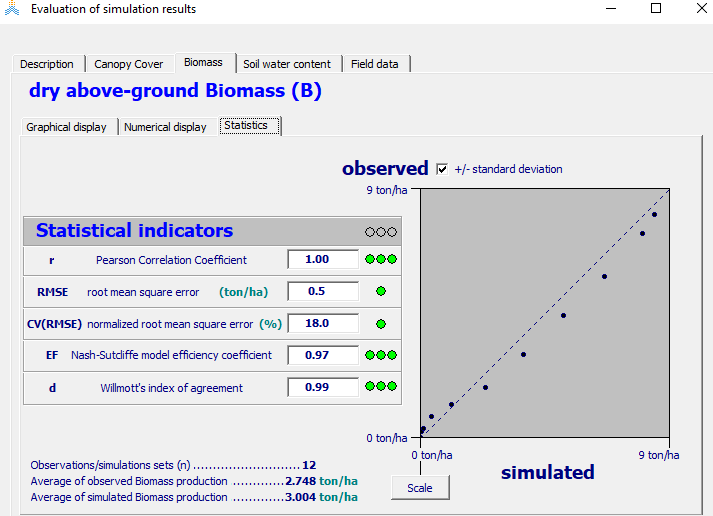


Figure 20: Validation performance of T7 on BM value


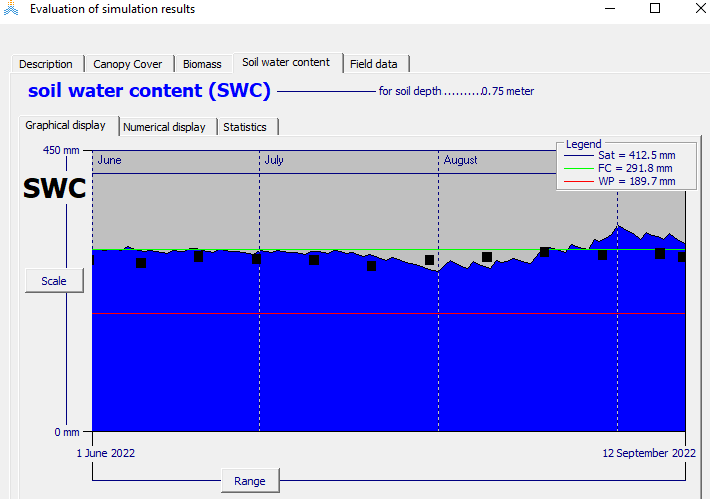

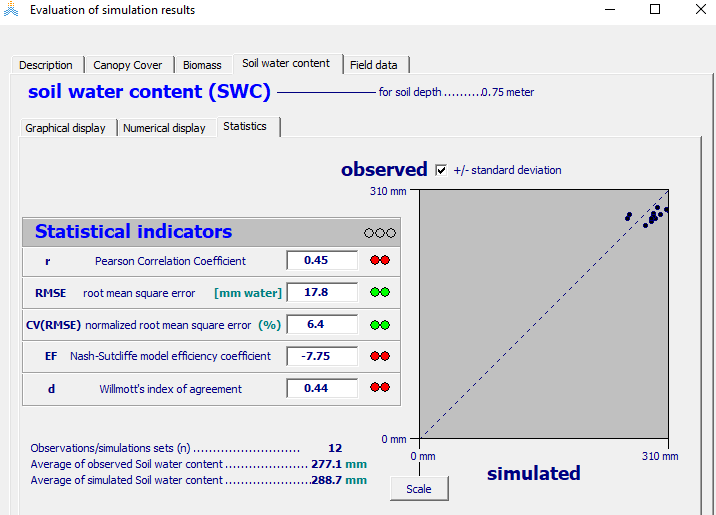


Figure 21: Validation performance of T7 on SWC value


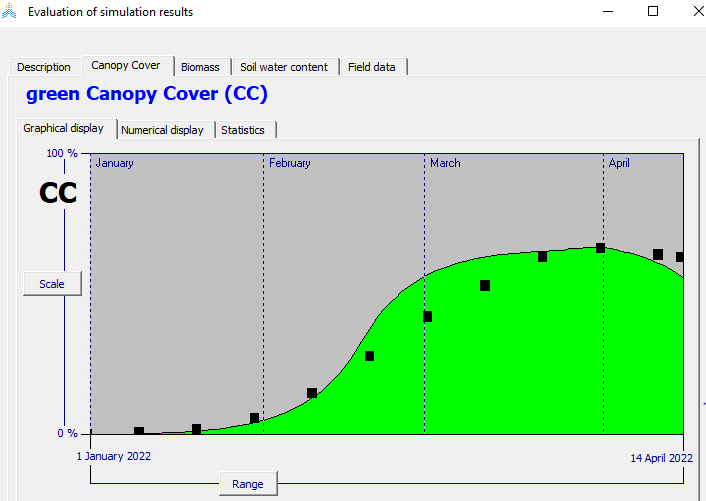

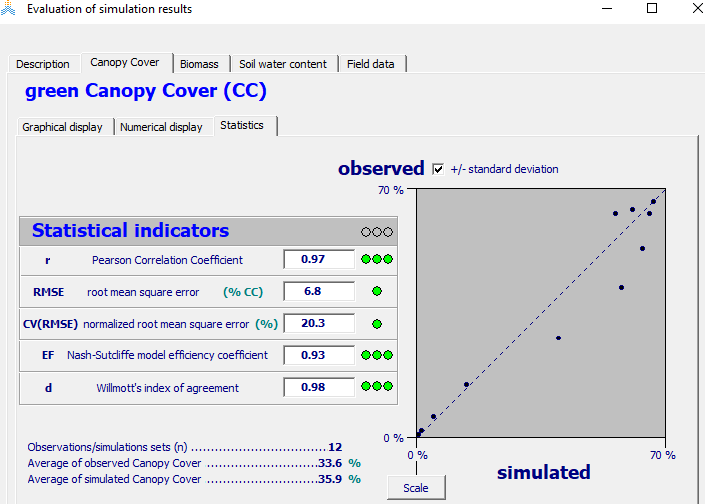


Figure 22: Validation performance of T8 on CC value


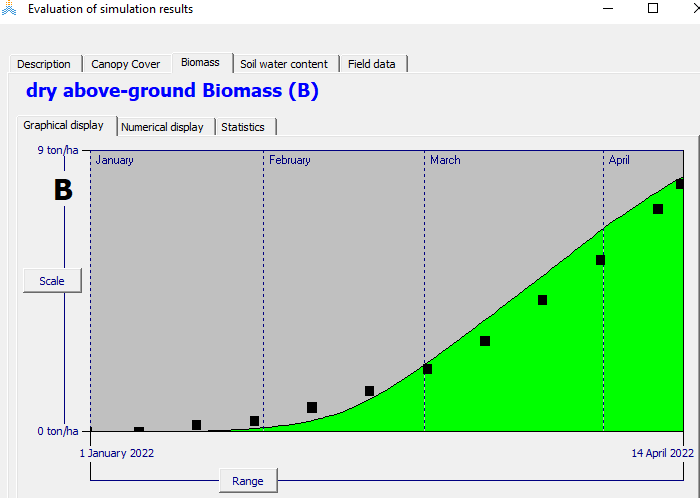

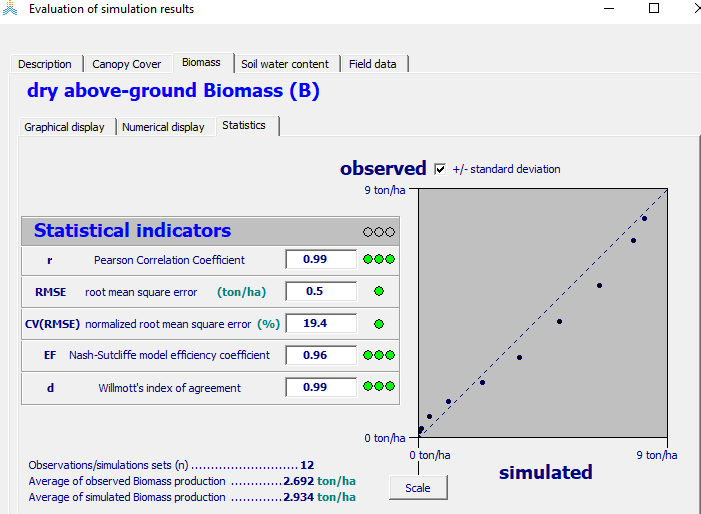


Figure 23: Validation performance of T8 on BM value


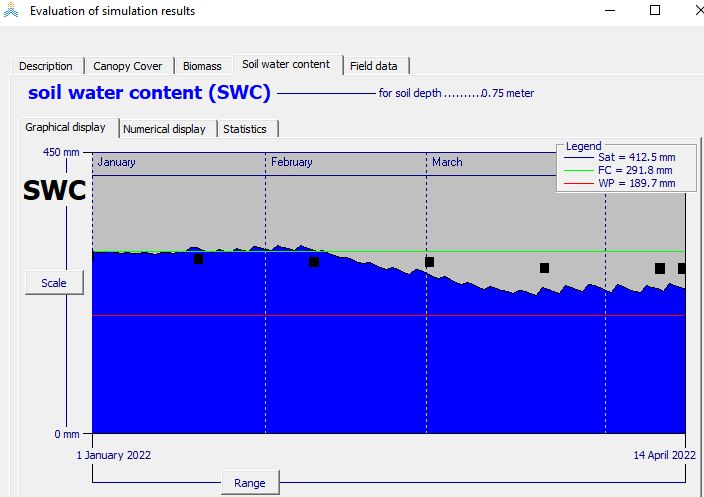

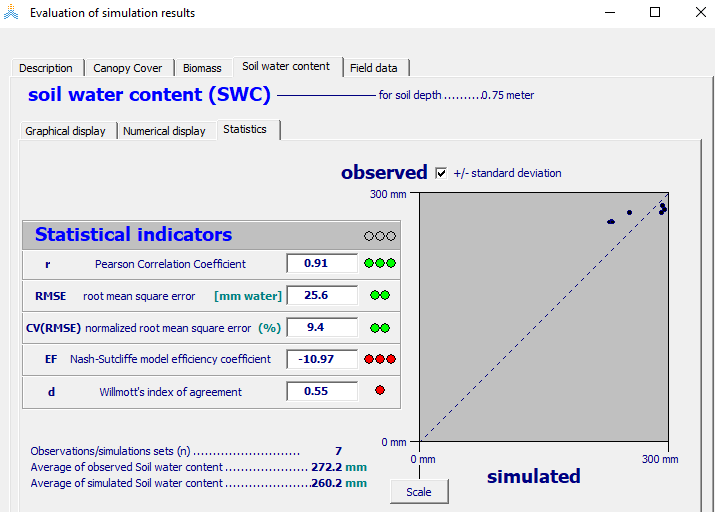
Figure 24: Validation performance of T8 on SWC value


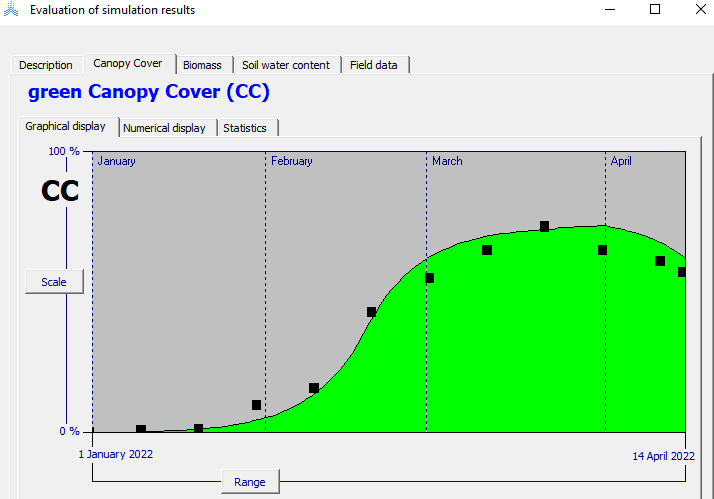

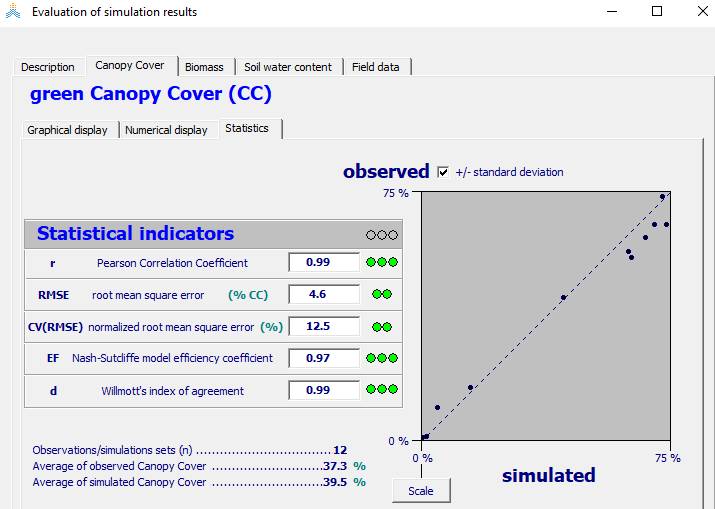


Figure 25: Validation performance of T9 on BM value


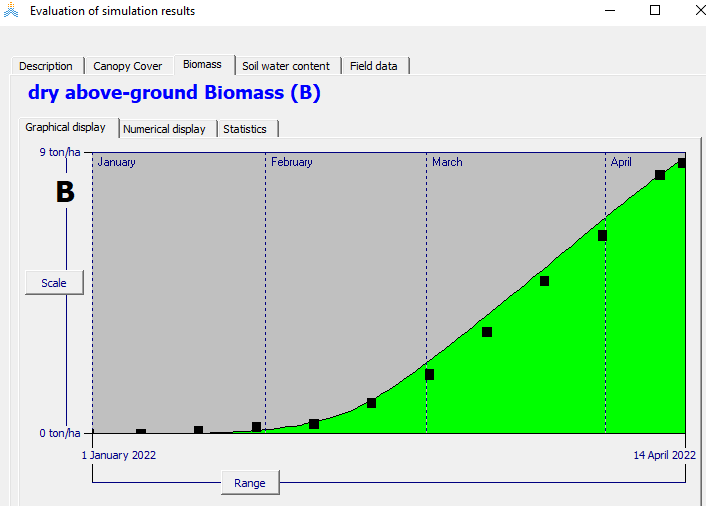

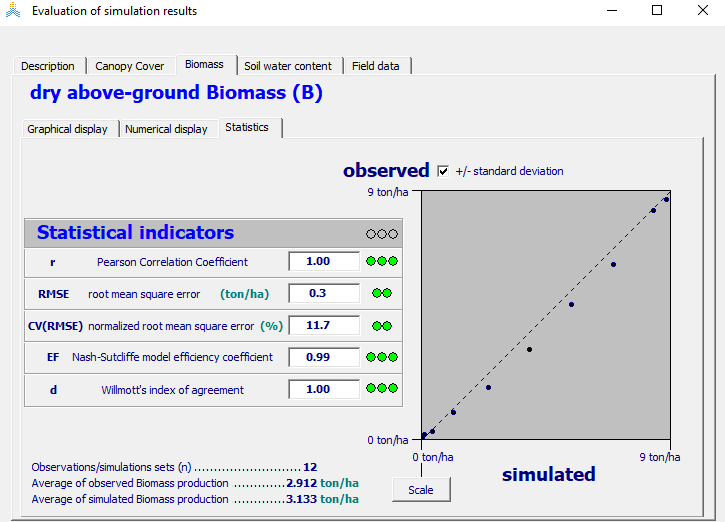


Figure 26: Validation performance of T9 on BM value


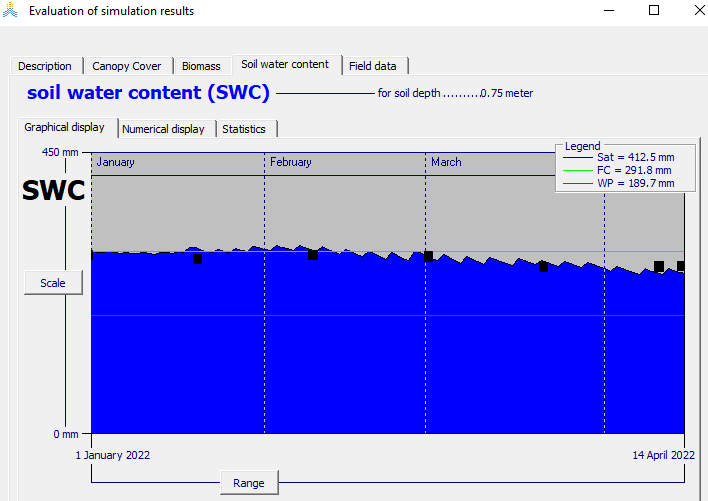

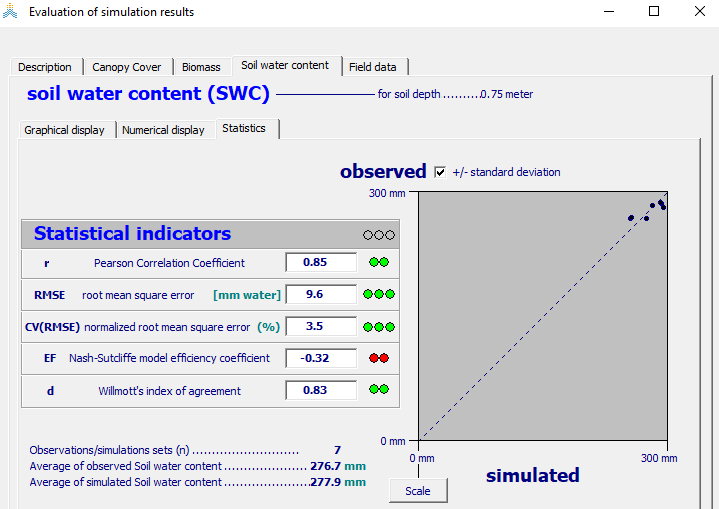


Figure 27: Validation performance of T9 on SWC value


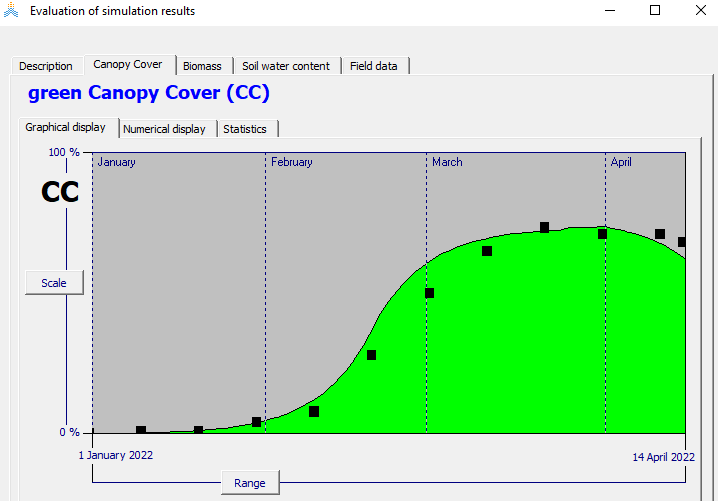

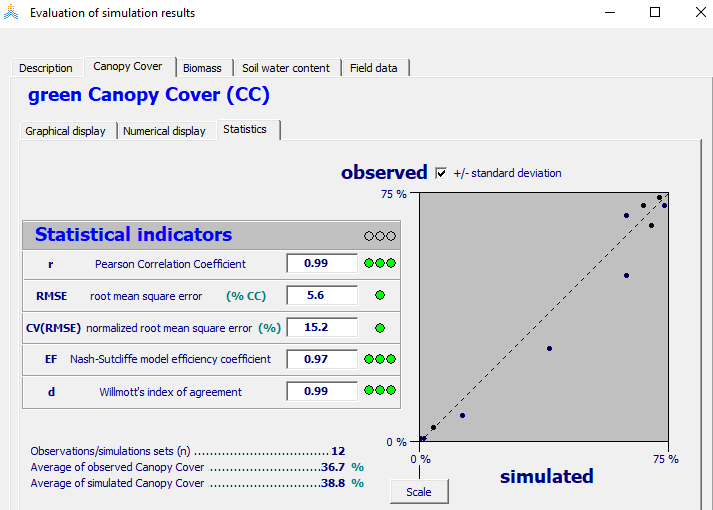


Figure 28: Validation performance of T10 on CC value


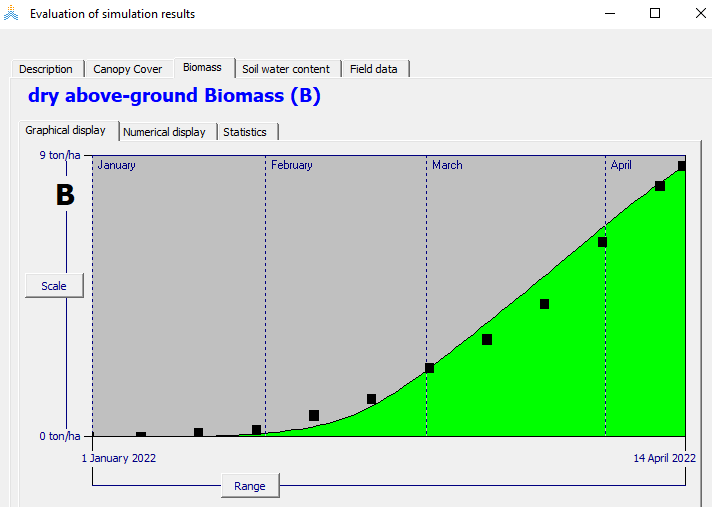

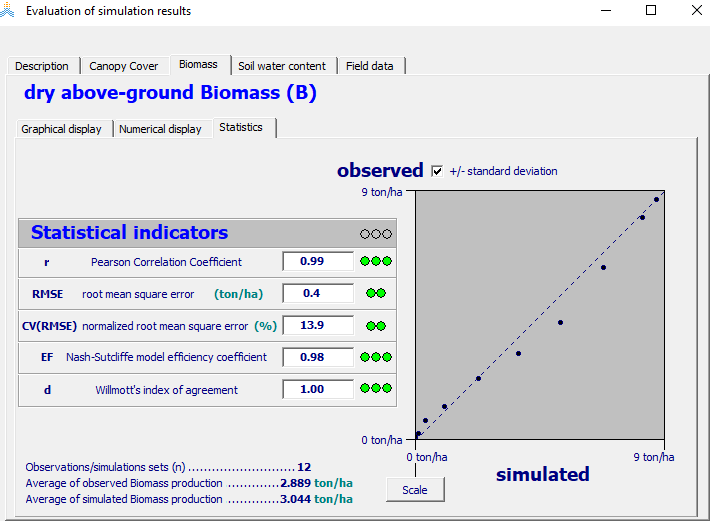


Figure 29: Validation performance of T10 on BM value


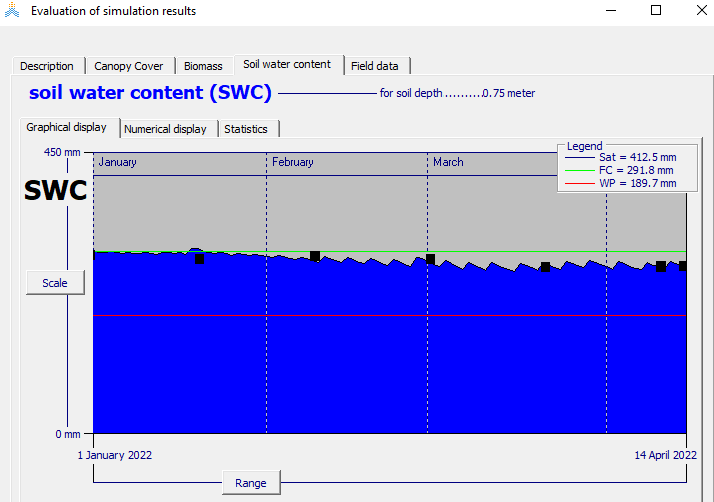

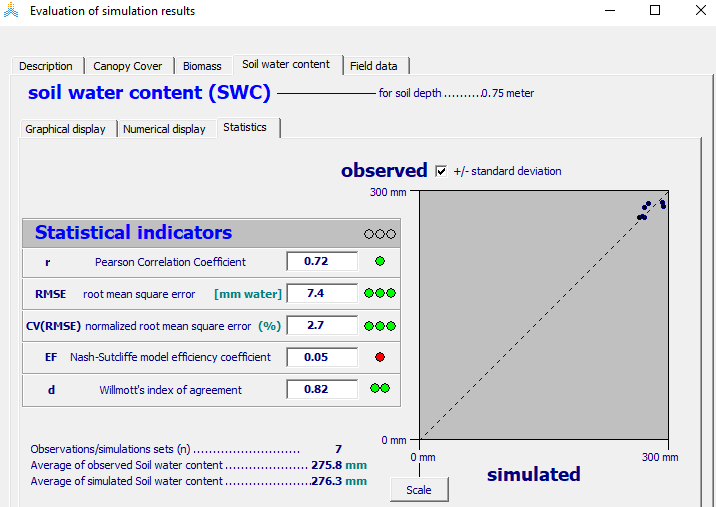


Figure 30: Validation performance of T10 on SWC value


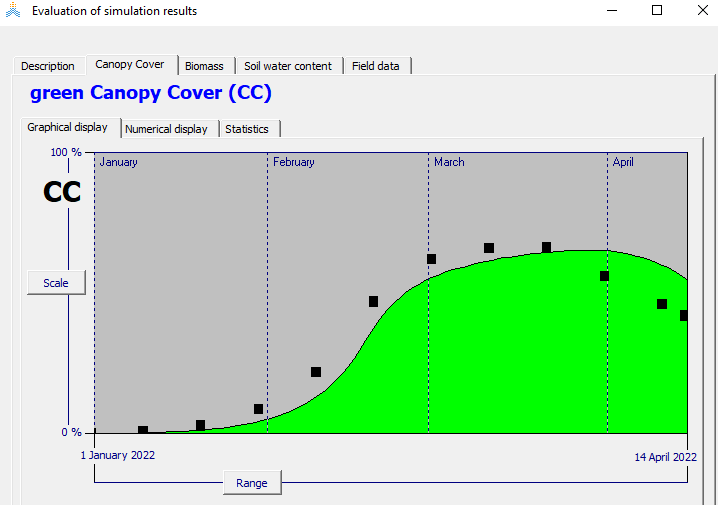

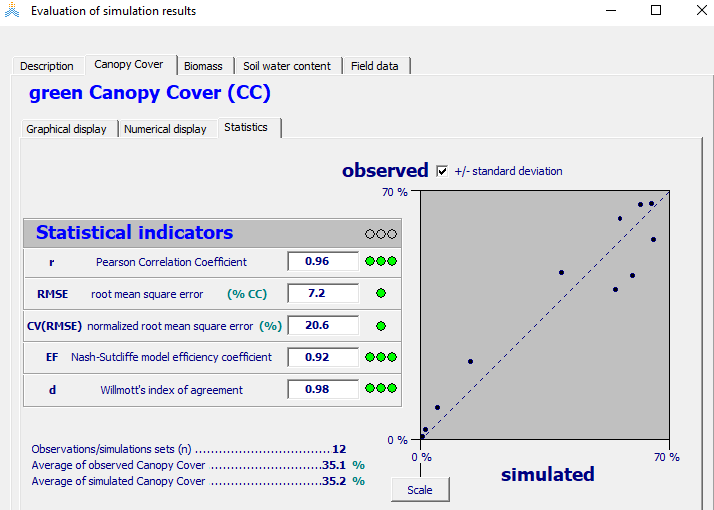


Figure 31: Validation performance of T11 on CC value


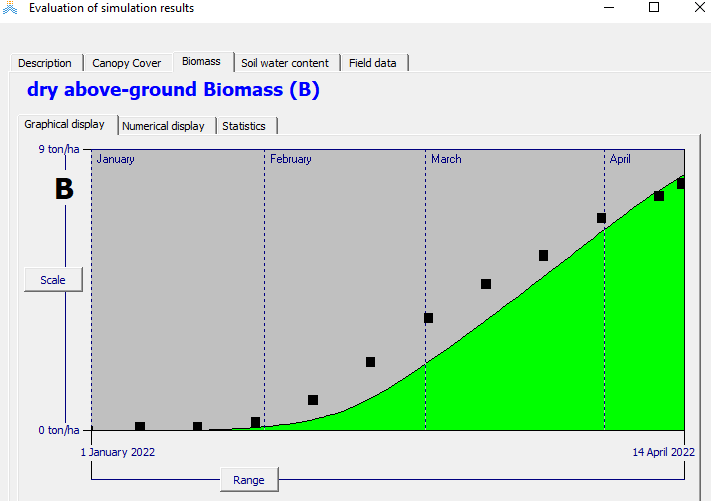

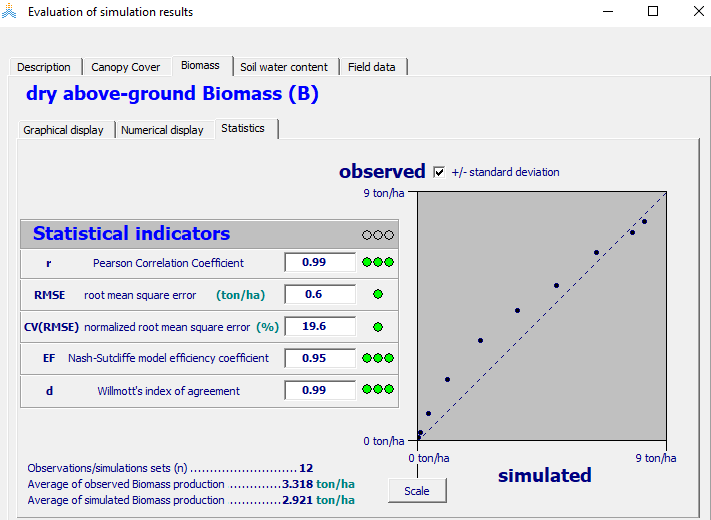


Figure 32: Validation performance of T11 on BM value


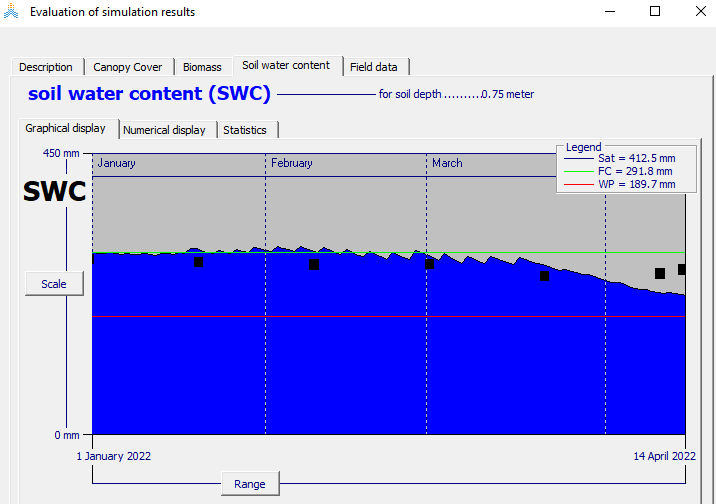

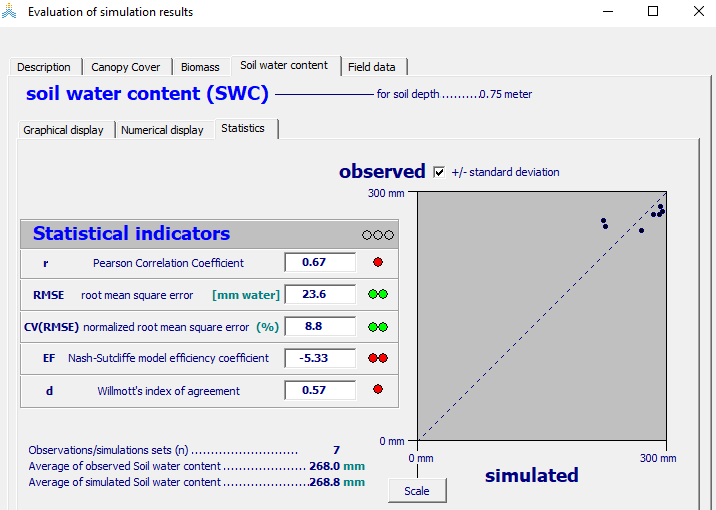


Figure 33: Validation performance of T11 on SWC value


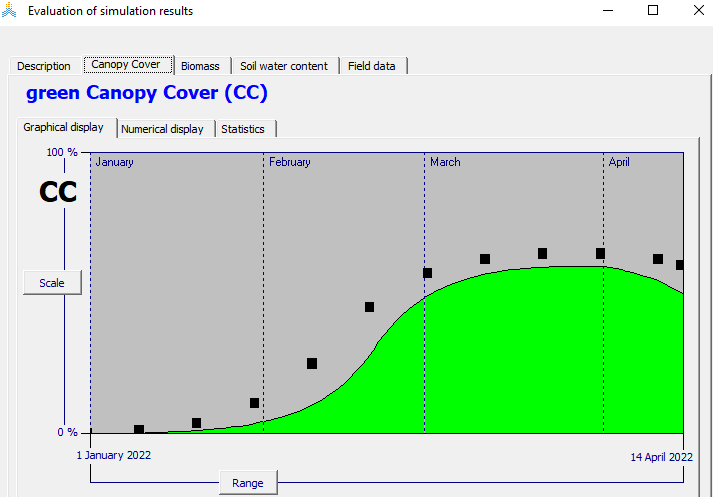

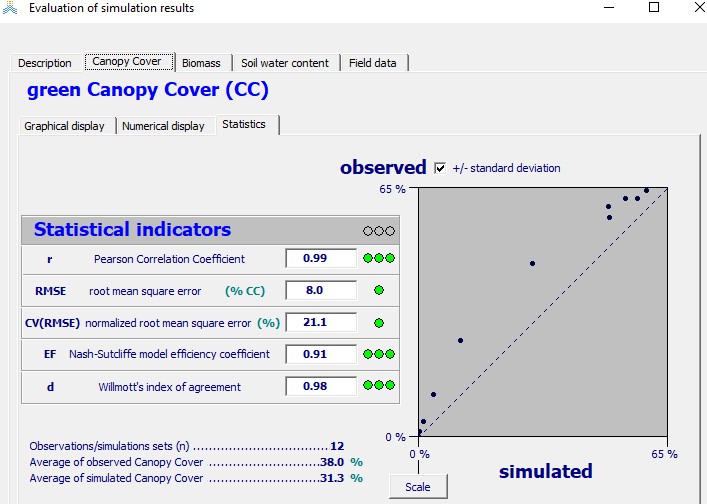


Figure 34: Validation performance of T12 on CC value


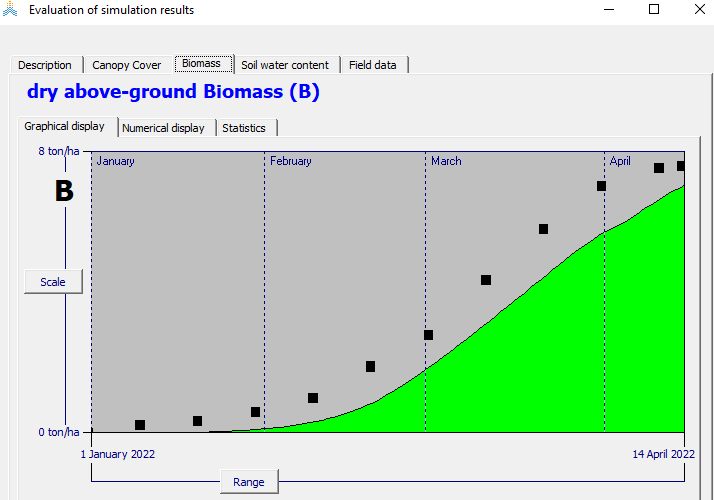

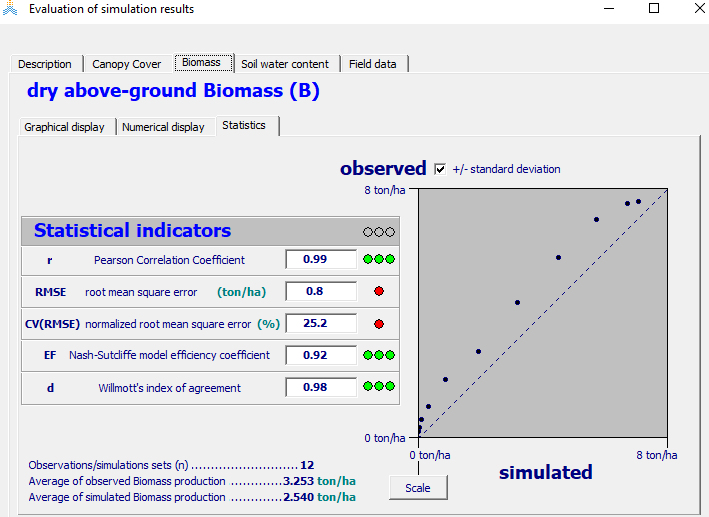


Figure 35: Validation performance of T12 on BM value


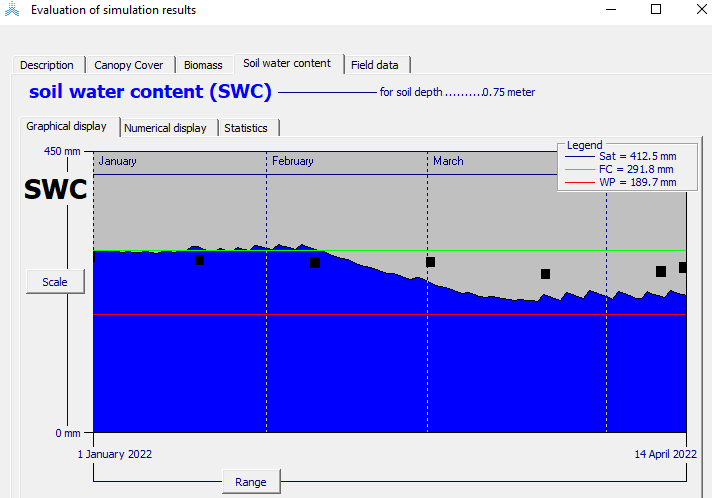

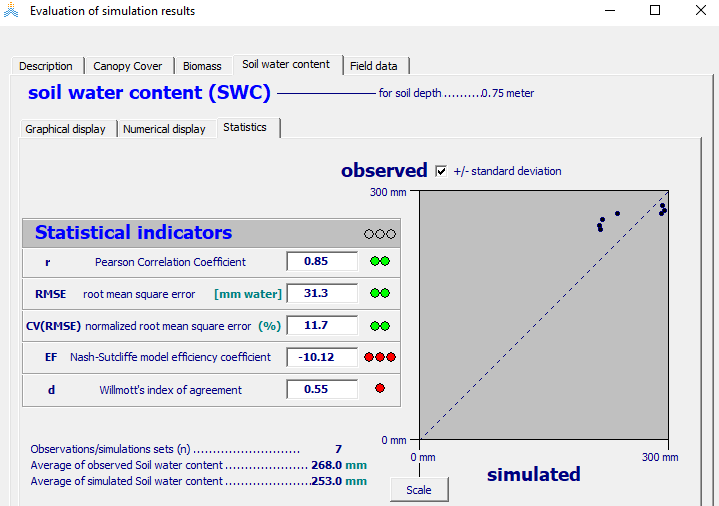


Figure 36: Validation performance of T12 on SWC value


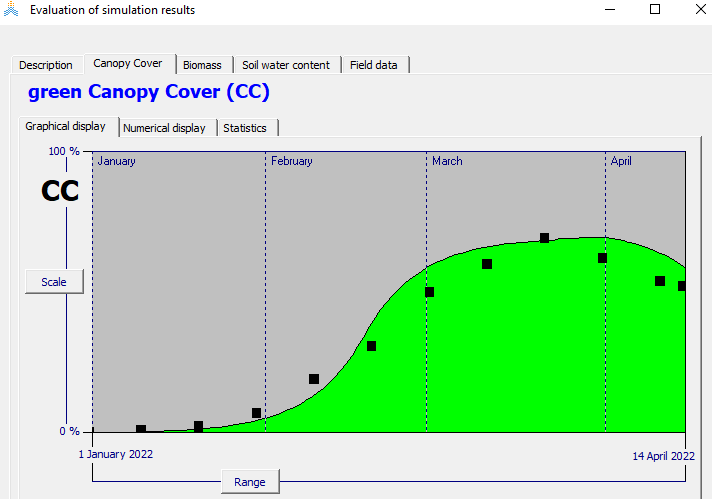

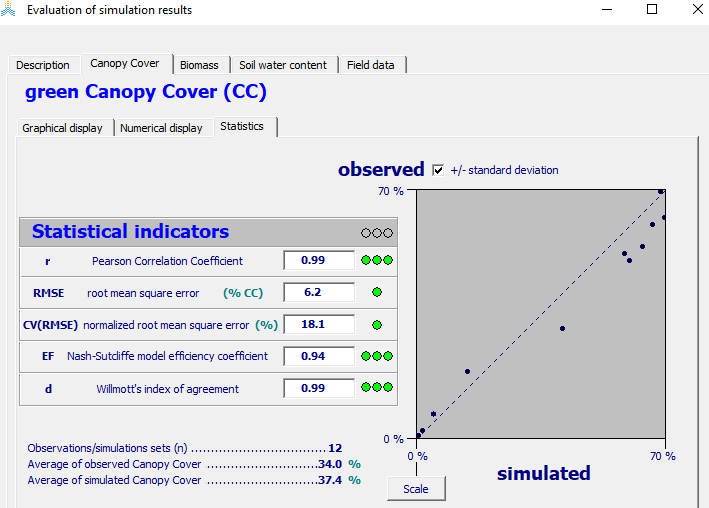


Figure 37: Validation performance of T13 on CC value


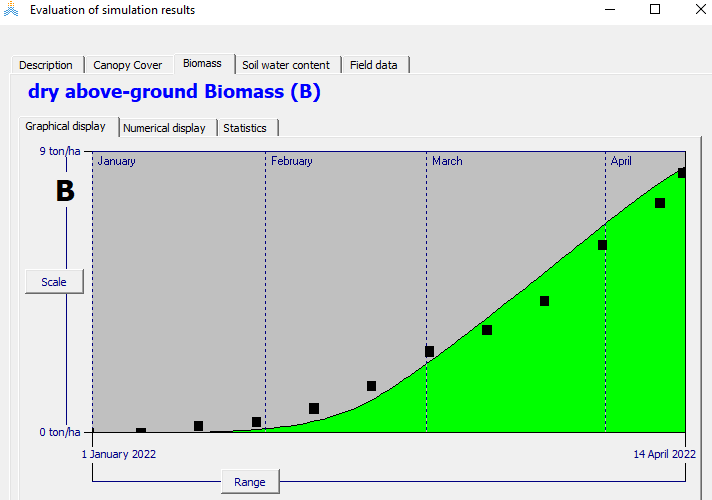

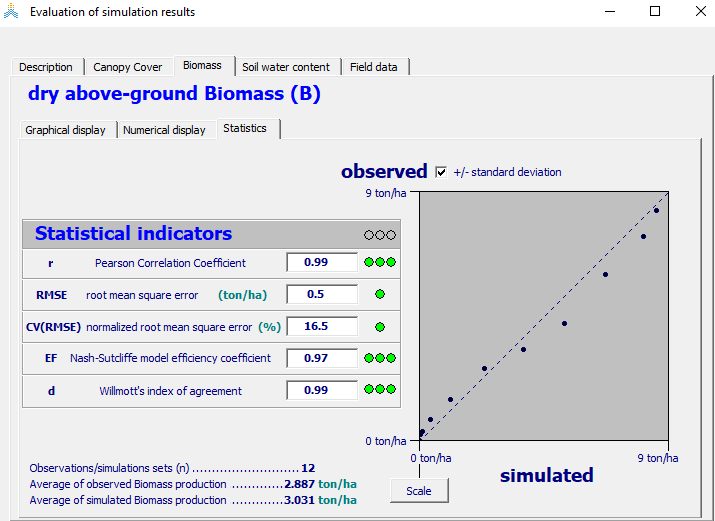


Figure 38: Validation performance of T13 on BM value


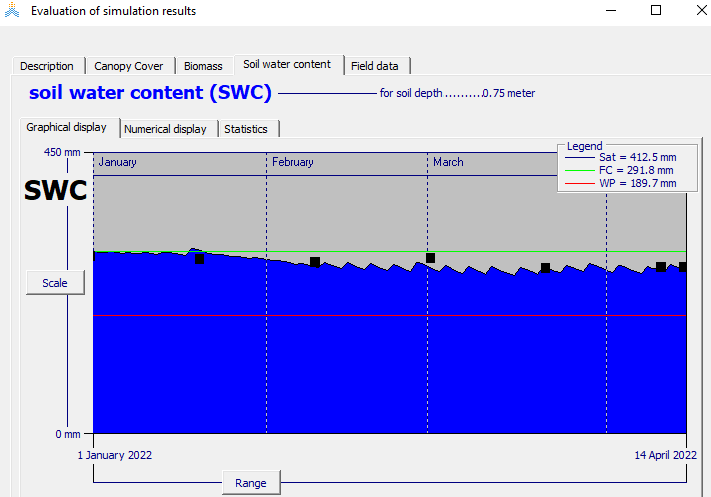

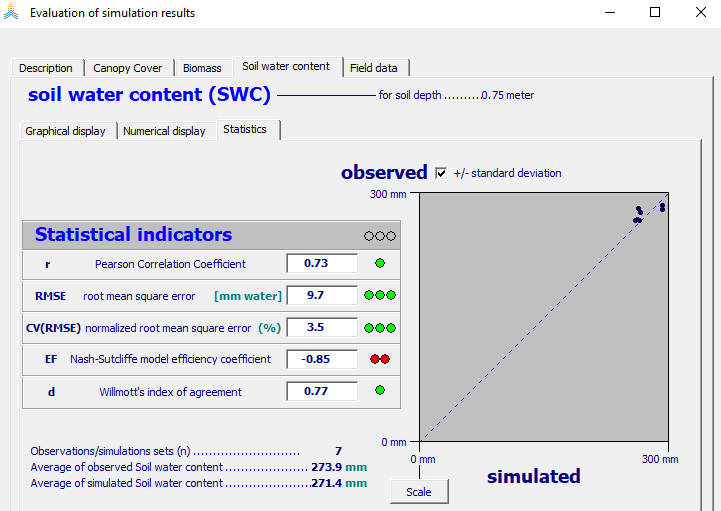


Figure 39: Validation performance of T13 on SWC value
